# Supplementary material
Source: publisher figshare collection journal article supplement (https://gsajournals.figshare.com/ndownloader/files/15090302)
Supplement: Supplementary file 1 [file 15090302]

**Table S1. Fungal (*A. nidulans* and *N. crassa*)strains used in this study**

| Strain | Genotype | Reference |
| --- | --- | --- |
| AGB551 | *nkuA***∆***::argB*, *pyrG89, pyroA4, veA+* | (Bayram *et al.* 2012) |
| AGB749 | *veA***∆***::argB, pyrG89* | (Sarikaya-Bayram *et al.* 2014) |
| VelB*∆* | *velB***∆***::ptrA; nkuA***∆***::argB*, *pyrG89, pyroA4, veA+* | This study |
| VosA*∆* | *vosA***∆***::ptrA; nkuA***∆***::argB*, *pyrG89, pyroA4, veA+* | This study |
| LaeA*∆* | *laeA***∆***::ptrA; nkuA***∆***::argB*, *pyrG89, pyroA4, veA+* | This study |
| VeA-531 | *pgpdA::ve-1::sgfp::pyroA::biA***∆***; veA***∆***::natR; nkuA***∆***::argB*, *pyrG89, pyroA4, veA+* | This study |
| VelB-532 | *pgpdA::ve-2::sgfp::pyroA::biA***∆***; velB***∆***::ptrA; nkuA***∆***::argB*, *pyrG89, pyroA4, veA+* | This study |
| VosA-533 | *pgpdA::vos-1::sgfp::pyroA::biA***∆***; vosA***∆***::ptrA; nkuA***∆***::argB*, *pyrG89, pyroA4, veA+* | This study |
| LaeA-534 | *pgpdA::lea-1::sgfp::pyroA::biA***∆***; laeA***∆***::ptrA; nkuA***∆***::argB*, *pyrG89, pyroA4, veA+* | This study |
| VeA-133 | *pve-1::ve-1::pyrG; veA***∆***::argB; pyrG89* | This study |
| VelB-322 | *pgpdA::ve-2::pyroA::biA***∆***; velB***∆***::ptrA; nkuA***∆***::argB*, *pyrG89, pyroA4, veA+* | This study |
| VosA-323 | *pgpdA::vos-1::pyroA::biA***∆***; vosA***∆***::ptrA; nkuA***∆***::argB*, *pyrG89, pyroA4, veA+* | This study |
| LaeA-299 | *pgpdA::le-1::pyroA::biA***∆***; laeA***∆***::ptrA; nkuA***∆***::argB*, *pyrG89, pyroA4, veA+* | This study |
| WT ORS | *SL6 Mat a* | FGSC#4200 |
| His-3A | *his-3 Mat A* | FGSC#6103 |
| His-3a | *his-3 Mat a* | FGSC#718 |
| ∆*mus52* | *∆mus52::barR his-3* | FGSC#9720 |
| ∆*mus52* | *∆mus52::barR mat a* | FGSC#9719 |
| WT OR23 | *74-OR23-1V mat a* | FGSC#2489 |
| ∆Ve-1 | **∆***ve-1::hph* | FGSC |
| ∆Ve-2 | **∆***ve-2::hph* | FGSC |
| ∆Vos-1 | **∆***vos-1::hph* | FGSC |
| ∆Lae-1 | **∆***lae-1::hph* | FGSC |
| C-VEL1GFP | *Pccg-1::ve-1::sgfp::his-3* | This study |
| C-VEL2GFP | *Pccg-1::ve-2::sgfp::his-3* | This study |
| C-VOS1GFP | *Pccg-1::vos-1::sgfp::his-3* | This study |
| C-LEA1GFP | *Pccg-1::lea-1::sgfp::his-3* | This study |
| VEL2GFPNAT | *Pve-2::ve-2::sgfp::hph* | This study |
| LEA1GFPNAT | *Plea-1::lea-1::sgfp::hph* | This study |
| H1-rfp | *Pccg-1::rfp::h1::his-3* | M. Freitag, USA |
| ∆ve-1; ∆mus52 | **∆***ve-1;* **∆***mus-52::bar+; his-3 mat A* | This study |
| NC11-veA::GFP | **∆***ve-1::veA::GFP* | This study |
| NC-veA::FLAG | **∆***ve-1::veA::10xgly3xFLAG* | This study |
| VEL1::3XFLAG | *ve-1::10Xgly3XFLAG* |  |
| VEL2::3XFLAG | *ve-2::10Xgly3XFLAG* | This study |
| VEL2::3XHA | *ve-2::10Xgly3XHA* | This study |
| LEA1::3XFLAG | *lae-1::10Xgly3XFLAG* | This study |
| LEA1::3XHA | *lae-1::10Xgly3XHA* | This study |
| VEL1::3XFLAG,VEL2::3XHA | *ve-1::10Xgly3XFLAG, ve-2::10Xgly3XHA* | This study |
| VEL1::3XFLAG,LEA1::3XHA | *ve-1::10Xgly3XFLAG, lae-1::10Xgly3XHA* | This study |
| VEL2::3XFLAG,LEA1::3XHA | *ve-2::10Xgly3XFLAG, lae-1::10Xgly3XHA* | This study |
